# Supplementary material
Source: PubMed Central journal article supplement (PMC3035127)
Supplement: nucl0101_0053SD1.pdf [file nucl0101_0053SD1.pdf]

## Supplement 1.

### TRANSMEMBRANE PREDICTIONS\* IN HUMAN LBR

| TMHMM   | SOSUI   | PSORT   | PROT<br>SCALE | TMAP    | TM pred | TOP pred |
|---------|---------|---------|---------------|---------|---------|----------|
| 209-231 | 211-232 | 215-231 | 212-232       | 207-235 | 214-230 | 213-233  |
| 253-275 | 258-280 | 261-277 | 258-278       | 255-283 | 258-276 | 258-278  |
| 296-318 | 295-317 | 298-314 | 299-319       | 294-314 | 296-314 | 297-317  |
| 322-344 | 326-348 | 326-342 | 326-346       | 323-343 | 326-346 | 326-346  |
|         | 388-410 | 392-408 | 386-406       | 387-407 | 391-411 | 389-409  |
| 414-436 | 413-435 | 418-434 |               | 415-435 | 414-432 | 414-434  |
| 451-470 | 449-471 | 451-467 | 447-467       | 445-473 | 451-476 | 451-471  |
| 482-504 | 483-505 | 485-501 | 481-501       | 483-511 | 481-501 | 481-501  |
| 554-576 |         |         | 561-581       | 552-580 | 549-570 | 562-582  |

\*<http://ca.expasy.org/tools/#pattern>

Supplement 2.

**SIMILARITY OF LBR HOMOLOGS TO HUMAN LBR**

| Gene / Species  | Accession    | Match to human LBR <sup>1</sup> |          |         | Match to Pfam <sup>2</sup> |           |
|-----------------|--------------|---------------------------------|----------|---------|----------------------------|-----------|
|                 |              | E value                         | Identity | Range   | LBR_tudor                  | ERG4_ERG2 |
| <b>LBR</b>      |              |                                 |          |         |                            |           |
| Human           | NP_919424    |                                 |          |         | 6e-41                      | 5e-221    |
| Mouse           | NP_598576    | 0.0                             | 79%      | 1-615   | 8e-41                      | 6e-213    |
| Platypus        | XP_001514211 | 0.0                             | 77%      | 1-615   | 2e-40                      | 9e-233    |
| Chicken         | NP_990673    | 0.0                             | 66%      | 1-608   | 2e-41                      | 0.0       |
| Frog            | NP_001079301 | 2e-159                          | 49%      | 5-615   | 7e-41                      | 1e-151    |
| Fish            | CAJ15494     | 6e-170                          | 50%      | 1-615   | 9e-42                      | 7e-170    |
| Sea urchin      | XP_786536    | 3e-118                          | 41%      | 1-615   | 1e-15                      | 8e-157    |
| Sea squirt      | XP_002126360 | 1e-84                           | 32%      | 5-615   | 2e-12                      | 3e-86     |
| <b>TM7SF2</b>   |              |                                 |          |         |                            |           |
| Human           | NP_003264    | 1e-136                          | 59%      | 207-615 | 0.12                       | 3e-175    |
| Mouse           | NP_082730    | 5e-136                          | 59%      | 207-615 | 0.13                       | 6e-168    |
| Frog            | NP_001079837 | 3e-145                          | 61%      | 203-615 | 0.64                       | 3e-194    |
| Fish            | NP_001008597 | 3e-138                          | 58%      | 203-615 | 0.69                       | 2e-188    |
| <b>DHCR7</b>    |              |                                 |          |         |                            |           |
| Human           | NP_001351    | 3e-65                           | 37%      | 262-615 | 0.61                       | 2e-85     |
| Mouse           | NP_031882    | 3e-66                           | 34%      | 203-615 | 0.61                       | 1e-85     |
| Platypus        | XP_001506255 | 3e-73                           | 36%      | 215-615 | 0.61                       | 6e-86     |
| Chicken         | XP_420914    | 5e-72                           | 33%      | 178-612 | 0.61                       | 1e-86     |
| Frog            | NP_001079586 | 4e-68                           | 34%      | 203-612 | 0.61                       | 3e-89     |
| Fish            | NP_958487    | 1e-69                           | 34%      | 203-615 | 0.55                       | 1e-88     |
| Sea urchin      | XP_781710    | 3e-70                           | 34%      | 203-615 | 0.72                       | 1e-92     |
| Sea squirt      | XP_002127572 | 7e-72                           | 36%      | 203-615 | 0.44                       | 3e-97     |
| Sea             | XP_001630468 | 8e-76                           | 40%      | 260-615 | 0.35                       | 2e-107    |
| <b>anemone</b>  |              |                                 |          |         |                            |           |
| Fungus          | XP_001819932 | 8e-56                           | 38%      | 262-615 | 0.38                       | 1e-62     |
| Plant           | AF257178     | 2e-68                           | 41%      | 247-615 | 0.91                       | 3e-72     |
| Drosophila dLBR | CAE54809     | 4e-26                           | 24%      | 110-615 | 0.44                       | 2e-9      |

<sup>1</sup> E value of the match to human LBR, with percent identity to human LBR over the specified range of human LBR, using blastp to the NCBI nr database

<sup>2</sup> E value of the match to Pfam Hidden Markov Models LBR\_tudor (PF09465) and ERG4\_ERG24 (PF01222), using hmmpfam
